# Supplementary material for: Sequence basis of Barnacle Cement Nanostructure is Defined by Proteins with Silk Homology
Source: PubMed Central journal article supplement (PMC5099703; doi:10.1038/srep36219), 2016-11-08

1  
2  
3  
4  
5  
6  
7  
8  
9  
10  
11  
12  
13  
14  
15  
16  
17  
18  
19  
20  
21  
22  
23  
24

## SUPPLEMENTARY INFORMATION SECTION

Sequence basis of Barnacle Cement Nanostructure is Defined by Proteins with Silk Homology

Christopher R. So<sup>1,\*</sup>, Kenan P. Fears<sup>1</sup>, Dagmar H. Leary<sup>2</sup>, Jenifer M. Scancell<sup>1</sup>, Zheng Wang<sup>2</sup>,  
Jinny Liu<sup>2</sup>, Beatriz Orihuela<sup>3</sup>, Dan Rittschof<sup>3</sup>, Christopher M. Spillmann<sup>2</sup> and Kathryn J. Wahl<sup>1,\*</sup>

<sup>1</sup>Chemistry Division, Code 6176, US Naval Research Laboratory, 4555 Overlook Ave, SW,  
Washington, DC, USA

<sup>2</sup>Center for Biomolecular Science and Engineering, Code 6900, US Naval Research Laboratory,  
4555 Overlook Ave, SW, Washington, DC, USA

<sup>3</sup>Nicholas School of the Environment and Earth Sciences, Duke University Marine Laboratory,  
Beaufort, NC, USA

\*Correspondence to: christopher.so@nrl.navy.mil or kathryn.wahl@nrl.navy.mil

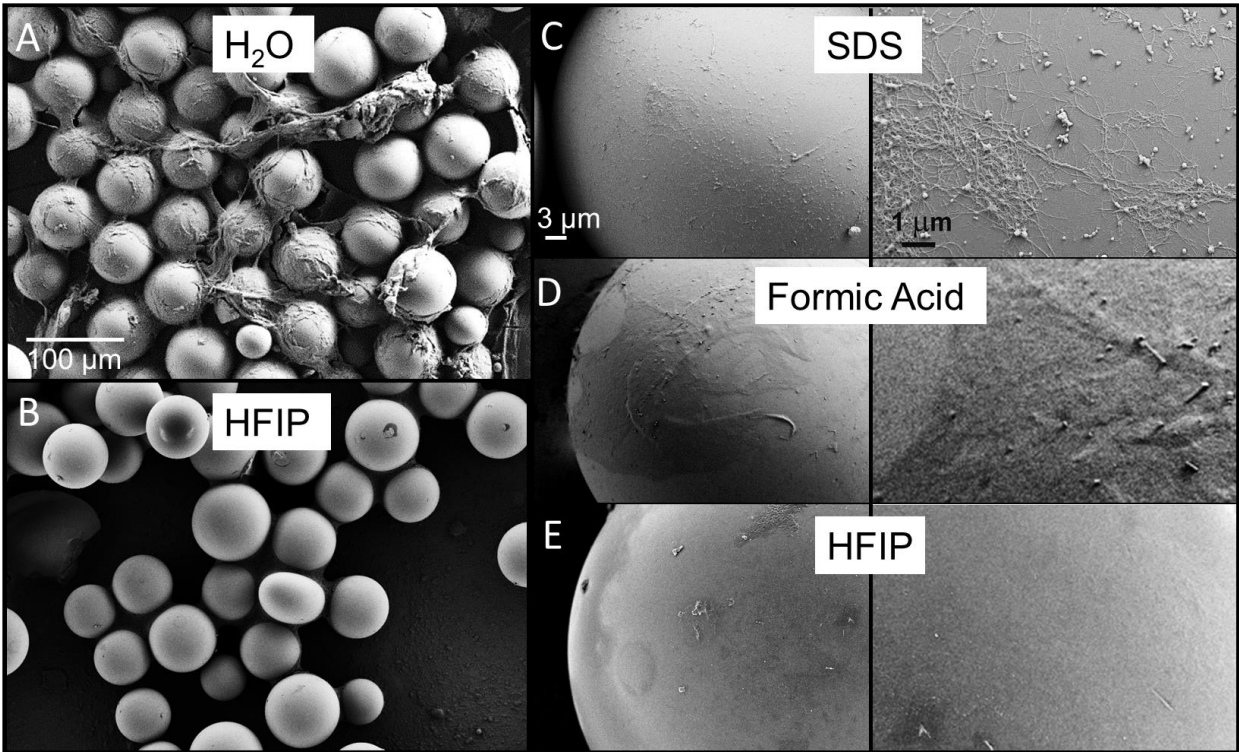

25

26

27 Supplementary Figure S1. Characterization of residual cement materials on beads after various  
 28 solvent rinses, demonstrating effectiveness of HFIP. Barnacles were settled on beads for 3 days  
 29 to produce a coated morphology observed in bead set A. Rinses were carried out by exposing  
 30 beads to various solvents for 10 minutes under ambient temperatures and pressures. A) Beads  
 31 attached to barnacle underside rinsed in artificial seawater, B) Beads rinsed in HFIP, magnified  
 32 images of C) Sodium dodecyl sulfate (SDS), D) Formic Acid and E) HFIP. Scale bars represent  
 33 images in each column.

34

35

36

37

38

39

40

| Identified Proteins                                                                                                   | Accession Number        | Gummy |      | Medallion | Microsphere |      |
|-----------------------------------------------------------------------------------------------------------------------|-------------------------|-------|------|-----------|-------------|------|
|                                                                                                                       |                         | 2015  | 2016 | 2016      | 2015        | 2016 |
| NRLmaseq.gb AFY13482.1  MULTIFUNCIn [Chthamalus fissus]                                                               | comp48163_c0_seq1_4     | 86    | 86   | 65        | 52          | 65   |
| NRLmaseq, ***** No hits found *****                                                                                   | comp41238_c0_seq1_4     | 18    | 29   | 13        | 21          | 32   |
| Aacp100k-1                                                                                                            | Aacp100k-1 (+1)         | 19    | 44   | 16        | 29          | 45   |
| NRLmaseq.gb AFY13480.1  MULTIFUNCIn [Balanus glandula]                                                                | comp39924_c0_seq1_5     | 34    | 56   | 36        | 30          | 32   |
| NRLmaseq.ref XP_001960248.1  uncharacterized protein Dana_GF11619.lysyl oxidase?[Drosophila ananassae]                | comp44772_c0_seq1_4     | 13    | 20   | 18        | 12          | 19   |
| Aacp114kDa                                                                                                            | Aacp114kDa              | 2     | 31   | 8         | 22          | 37   |
| Aacp19k                                                                                                               | Aacp19k (+1)            | 12    | 12   | 7         | 6           | 10   |
| NRLmaseq, ***** No hits found *****                                                                                   | comp47308_c0_seq1_4     | 10    | 20   | 1         | 20          | 25   |
| NRLmaseq.XP_013410251.1  PREDICTED: extracellular matrix protein FRAS1-like [Lingula anatina]                         | comp48220_c0_seq1_6     | 13    | 17   | 1         | 13          | 17   |
| NRLmaseq                                                                                                              | comp40848_c1_seq1_4     | 1     | 12   | 0         | 16          | 15   |
| NRLmaseq.ref XP_001946672.2  PREDICTED: chorion peroxidase-like [Acyrtosiphon pisum]                                  | comp27704_c0_seq1_6     | 12    | 10   | 8         | 8           | 9    |
| NRLmaseq, ***** No hits found *****                                                                                   | comp46881_c0_seq1_4     | 4     | 18   | 0         | 4           | 15   |
| NRLmaseq.ref WP_007419168.1  hypothetical protein [Idiomarina sp. A28L]                                               | comp39288_c0_seq1_5     | 6     | 23   | 3         | 9           | 16   |
| NRLmaseq.dbj BAE94410.1  cement protein-19k partial [Fistulobalanus albicostatus]                                     | comp45928_c1_seq1_6     | 10    | 18   | 0         | 11          | 13   |
| Shell.ref XP_003292819.1  hypothetical protein DICPUDRAFT_58166 [Dictyostelium purpureum]                             | CL9487.Contig1_Ba_mix_  | 11    | 9    | 5         | 5           | 6    |
| NRLmaseq.gb EFX80390.1  hypothetical protein DAPPUDRAFT_318553.peroxidase?. [Daphnia pulex]                           | comp45999_c0_seq1_4     | 10    | 7    | 8         | 6           | 7    |
| NRLmaseq.ref XP_011183022.1  PREDICTED: antichymotrypsin-2-like isoform X5 [Bactrocera cucurbitae]                    | comp45011_c0_seq1_5 (+  | 6     | 10   | 10        | 6           | 8    |
| CYPRIDJPR2013.gb AAR33079.1  settlement inducing protein complex [Amphibalanus amphitrite]                            | CL68.Contig2_Ba_mix (+1 | 1     | 9    | 18        | 0           | 23   |
| NRLmaseq.ref XP_008945901.1  PREDICTED: LOW QUALITY PROTEIN: thimet oligopeptidase, partial [Merops nubicus]          | comp135234_c0_seq1_5    | 7     | 4    | 3         | 4           | 4    |
| NRLmaseq.dbj BAE94409.1  cement protein-19k [Megabalanus rosa]                                                        | comp40515_c0_seq1_5     | 7     | 9    | 1         | 5           | 6    |
| NRLmaseq.ref XP_015373617.1  PREDICTED: peroxidase-like [Diuraphis noxia]                                             | comp42709_c1_seq1_4     | 1     | 11   | 7         | 8           | 8    |
| NRLmaseq                                                                                                              | comp45426_c2_seq1_2     | 2     | 5    | 4         | 1           | 4    |
| NRLmaseq.emb CEP02176.1  hypothetical protein PBRA_002441 [Plasmodiophora brassicae]                                  | comp27343_c0_seq1_4     | 7     | 9    | 4         | 3           | 7    |
| NRLmaseq.ref XP_011366188.1  PREDICTED: beta-1,4-N-acetylgalactosaminyltransferase 3 [Pteropus vampyrus]              | comp38042_c0_seq1_4     | 1     | 5    | 5         | 4           | 6    |
| NRLmaseq.ref WP_045875785.1  hypothetical protein [Frankiasp. DC12]                                                   | comp40644_c0_seq1_4     | 5     | 24   | 3         | 0           | 2    |
| NRLmaseq.emb CBY30585.1  unnamed protein product [Oikopleura dioica]                                                  | comp42253_c0_seq1_4     | 4     | 11   | 1         | 2           | 7    |
| NRLmaseq, ***** No hits found *****                                                                                   | comp33562_c1_seq1_4     | 6     | 8    | 0         | 4           | 6    |
| NRLmaseq.ref XP_006817093.1  PREDICTED: uncharacterized protein LOC100376421 [Saccoglossus kowalevskii]               | comp47369_c0_seq1_5     | 1     | 11   | 3         | 0           | 0    |
| NRLmaseq.gb KMQ91245.1  abc transporter permease [Lasius niger]                                                       | comp25334_c1_seq1_5     | 5     | 10   | 0         | 6           | 12   |
| NRLmaseq.dbj BAM34601.1  waterborne settlement pheromone [Amphibalanus amphitrite]                                    | comp25618_c0_seq1_5 (+  | 0     | 7    | 4         | 0           | 7    |
| NRLmaseq.ref XP_014606419.1  PREDICTED: serine protease inhibitor 3/4-like isoform X6 [Polistes canadensis]           | comp44898_c1_seq2_4     | 2     | 6    | 6         | 0           | 5    |
| NRLmaseq.ref XP_012711402.1  PREDICTED: leukocyte elastase inhibitor-like isoform X2 [Fundulus heteroclitus]          | comp42589_c2_seq1_5     | 5     | 10   | 3         | 4           | 6    |
| NRLmaseq, ***** No hits found *****                                                                                   | comp46137_c1_seq5_5     | 6     | 16   | 0         | 2           | 12   |
| NP_034723.1 junction plakoglobin [Mus musculus]                                                                       | 28395018 ref            | 2     | 0    | 1         | 0           | 18   |
| NRLmaseq.ref XP_013313762.1  hypothetical protein PV05_08770 [Exophiala xenobiotica]                                  | comp42837_c0_seq1_6     | 2     | 10   | 3         | 2           | 1    |
| NRLmaseq.ref XP_011871194.1  PREDICTED: venom allergen 3-like [Vollenhovia emeryi]                                    | comp47983_c0_seq1_6     | 6     | 7    | 2         | 2           | 6    |
| ACQ12582.1 Sequence 18 from patent US 7507710                                                                         | 228300741 gb (+2)       | 5     | 0    | 2         | 4           | 0    |
| NRLmaseq                                                                                                              | comp27000_c0_seq1_6     | 0     | 6    | 1         | 0           | 2    |
| NRLmaseq.ref XP_012246550.1  PREDICTED: papilin isoform X3 [Bombus impatiens]                                         | comp46330_c0_seq1_6     | 5     | 7    | 5         | 9           | 8    |
| NRLmaseq, ***** No hits found *****                                                                                   | comp27593_c0_seq1_5     | 6     | 9    | 1         | 3           | 6    |
| NRLmaseq.emb CDZ62397.1  Two component sensor histidine kinase FecR/PupR [Neorhizobium galegae bv. orientalis]        | comp38220_c1_seq1_5     | 5     | 6    | 2         | 5           | 4    |
| NRLmaseq.ref XP_009052071.1  hypothetical protein LOTGIDRAFT_159529 [Lottia gigantea]                                 | comp32063_c0_seq1_4     | 4     | 7    | 3         | 2           | 3    |
| NRLmaseq.ref XP_013775632.1  PREDICTED: peroxidase-like [Limulus polyphemus]                                          | comp83572_c0_seq1_4     | 0     | 7    | 4         | 4           | 6    |
| NRLmaseq.gb ACJ12892.1  vitellogenin 2 [Tigriopus japonicus]                                                          | comp47893_c0_seq1_2     | 0     | 1    | 2         | 0           | 13   |
| NRLmaseq.gb AGR65306.1  hypothetical protein N134_07035 [Lactobacillus reuteri TD1]                                   | comp43534_c0_seq1_4     | 5     | 5    | 0         | 3           | 2    |
| NRLmaseq                                                                                                              | comp53583_c0_seq1_4     | 0     | 10   | 0         | 1           | 5    |
| Shell.ref XP_015373617.1  PREDICTED: peroxidase-like [Diuraphis noxia]                                                | CL8390.Contig1_Ba_mix_4 | 0     | 0    | 20        | 0           | 0    |
| NRLmaseq, ***** No hits found *****                                                                                   | comp56597_c0_seq1_4     | 5     | 5    | 4         | 3           | 2    |
| NP_033739.1 actin, cytoplasmic 2 [Mus musculus]                                                                       | 6752954 ref             | 3     | 0    | 4         | 2           | 6    |
| NRLmaseq.ref WP_035247368.1  phage host specificity protein [Actibacterium atlanticum]                                | comp55167_c0_seq1_4     | 3     | 6    | 2         | 2           | 1    |
| NRLmaseq                                                                                                              | comp48743_c0_seq1_6     | 0     | 8    | 0         | 1           | 2    |
| NRLmaseq.gb EFX81056.1  hypothetical protein DAPPUDRAFT_50513 lysyl oxidase?[Daphnia pulex]                           | comp43852_c1_seq1_2     | 3     | 3    | 4         | 3           | 2    |
| Shell.gb EFX74857.1  hypothetical protein DAPPUDRAFT_323929(vitellogenin?) [Daphnia pulex]                            | CL775.Contig1_Ba_mix_4  | 0     | 1    | 1         | 0           | 15   |
| NRLmaseq.ref XP_006628687.1  PREDICTED: cell migration-inducing and hyaluronan-binding protein [Lepisosteus oculatus] | comp80448_c0_seq1_4     | 2     | 4    | 2         | 2           | 2    |
| NRLmaseq.ref XP_013782980.1  PREDICTED: clotting factor B-like [Limulus polyphemus]                                   | comp41724_c1_seq1_5     | 4     | 6    | 0         | 3           | 4    |
| NRLmaseq                                                                                                              | comp44898_c1_seq4_5     | 0     | 3    | 3         | 1           | 7    |
| NRLmaseq                                                                                                              | comp47216_c0_seq1_5 (+  | 0     | 0    | 4         | 0           | 7    |
| NRLmaseq.ref XP_002072489.2  uncharacterized protein Dwil_GK12466 [Drosophila willistoni]                             | comp46953_c1_seq1_5 (+  | 0     | 1    | 2         | 0           | 9    |
| NRLmaseq                                                                                                              | comp51115_c0_seq1_6     | 0     | 7    | 0         | 0           | 3    |
| NRLmaseq.ref NP_001303466.1  uncharacterized protein Dmel_CG10407, isoform C [Drosophila melanogaster]                | comp55944_c0_seq1_4     | 3     | 5    | 2         | 2           | 2    |
| NP_001933.2 desmoglein-1 preproprotein [Homo sapiens]                                                                 | 119703744 ref           | 0     | 0    | 0         | 0           | 9    |
| NRLmaseq, ***** No hits found *****                                                                                   | comp46196_c0_seq1_5     | 1     | 3    | 0         | 1           | 6    |
| NRLmaseq.ref XP_011265929.1  PREDICTED: uncharacterized protein LOC105257175 [Camponotus floridanus]                  | comp54786_c0_seq1_4     | 3     | 7    | 1         | 1           | 2    |
| NRLmaseq.ref XP_014087846.1  PREDICTED: serine protease snake-like [Bactrocera oleae]                                 | comp25062_c0_seq1_5     | 4     | 7    | 0         | 0           | 1    |
| NRLmaseq.dbj BAM34601.1  waterborne settlement pheromone [Amphibalanus amphitrite]                                    | comp47419_c0_seq1_5 (+  | 0     | 0    | 2         | 0           | 5    |
| Shell.gb EGT46899.1  hypothetical protein CAEBREN_29437 [Caenorhabditis brenneni]                                     | Unigene4323_Ba_mix_1    | 2     | 4    | 1         | 4           | 0    |
| NRLmaseq                                                                                                              | comp47727_c0_seq1_4     | 0     | 4    | 0         | 0           | 2    |
| Shell.ref XP_012283862.1  PREDICTED: serine protease 42-like isoform X2 [Orussus abietinus]                           | CL200.Contig3_Ba_mix_3  | 0     | 0    | 1         | 0           | 8    |

|                                                                                                                                                                                                                                                                                                                                                                |                        |   |   |   |   |    |
|----------------------------------------------------------------------------------------------------------------------------------------------------------------------------------------------------------------------------------------------------------------------------------------------------------------------------------------------------------------|------------------------|---|---|---|---|----|
| NRLnaseq                                                                                                                                                                                                                                                                                                                                                       | comp44495_c1_seq1_5    | 0 | 4 | 1 | 0 | 1  |
| NRLnaseq,ref WP_045192707.1  bifunctional glutamine-synthetase<br>adenylyltransferase/deadenylyltransferase [Terrabacter sp.28]                                                                                                                                                                                                                                | comp48863_c0_seq1_5    | 2 | 4 | 0 | 0 | 3  |
| NRLnaseq,ref XP_011067728.1  PREDICTED: peroxidase-like isoform X4 [Acromyrmex echinator]                                                                                                                                                                                                                                                                      | comp25540_c0_seq1_6    | 0 | 4 | 3 | 0 | 2  |
| NRLnaseq,ref XP_014405601.1  PREDICTED: zonadhesin [Myotis brandtii]                                                                                                                                                                                                                                                                                           | comp43534_c0_seq2_4    | 6 | 5 | 1 | 0 | 0  |
| NRLnaseq,gb AFY13482.1  MULTIFUNCIN [Chthamalus fissus]                                                                                                                                                                                                                                                                                                        | comp41028_c1_seq1_5    | 0 | 3 | 0 | 0 | 10 |
| NRLnaseq,***** No hits found *****                                                                                                                                                                                                                                                                                                                             | comp101276_c0_seq1_4   | 3 | 2 | 4 | 0 | 0  |
| NRLnaseq,ref XP_013104691.1  PREDICTED: antichymotrypsin-2-like isoform X4 [Stomoxys calcitrans]                                                                                                                                                                                                                                                               | comp44997_c0_seq1_6    | 2 | 5 | 0 | 2 | 3  |
| 1H9Z A Chain A, Human Serum Albumin Complexed With Myristic Acid And The R-(+) Enantiomer Of<br>Warfarin                                                                                                                                                                                                                                                       | 14719644 pdb (+2)      | 1 | 1 | 1 | 0 | 5  |
| NRLnaseq                                                                                                                                                                                                                                                                                                                                                       | comp55903_c0_seq1_6    | 0 | 4 | 0 | 0 | 1  |
| NRLnaseq,gb KRG90602.1  hypothetical protein GLYMA_20G101900 [Glycine max]                                                                                                                                                                                                                                                                                     | comp47087_c0_seq1_6    | 0 | 0 | 0 | 1 | 4  |
| NRLnaseq                                                                                                                                                                                                                                                                                                                                                       | comp41421_c1_seq1_1    | 0 | 0 | 5 | 0 | 0  |
| ADV40105.1 putative germinal histone H4 [Latrodectus hesperus]                                                                                                                                                                                                                                                                                                 | 318087026 gb (+15)     | 0 | 0 | 6 | 0 | 2  |
| Shell,gb EFX81683.1 alpha-carbonicanhydrase[Daphniapulex]                                                                                                                                                                                                                                                                                                      | CL15286.Contig1_Ba_mix | 0 | 0 | 5 | 0 | 0  |
| NRLnaseq                                                                                                                                                                                                                                                                                                                                                       | comp40607_c0_seq1_6    | 2 | 4 | 0 | 0 | 1  |
| NRLnaseq                                                                                                                                                                                                                                                                                                                                                       | comp40906_c1_seq1_5    | 1 | 5 | 0 | 0 | 1  |
| P07355.2ANXA2_HUMAN RecName: Full=Annexin A2; AltName: Full=Annexin II; AltName: Full=Annexin-<br>2; AltName: Full=Calpactin I heavy chain; AltName: Full=Calpactin-1 heavy chain; AltName:<br>Full=Chromobindin-8; AltName: Full=Lipocortin II; AltName: Full=Placental anticoagulant protein IV;<br>Short=PAP-IV; AltName: Full=Protein I; AltName: Full=p36 | 113950 sp (+8)         | 0 | 0 | 0 | 0 | 5  |
| NRLnaseq,ref WP_015152096.1  DNA/RNA endonuclease G, NUC1 [Oscillatoria acuminata]                                                                                                                                                                                                                                                                             | comp37235_c0_seq1_4    | 1 | 4 | 0 | 0 | 0  |
| NP_077739.1 desmocollin-1 isoform Dsc1a preproprotein [Homo sapiens]                                                                                                                                                                                                                                                                                           | 13435361 ref (+1)      | 0 | 0 | 0 | 0 | 5  |
| NRLnaseq                                                                                                                                                                                                                                                                                                                                                       | comp45721_c0_seq1_6 (+ | 0 | 0 | 0 | 0 | 4  |
| NRLnaseq                                                                                                                                                                                                                                                                                                                                                       | comp57366_c0_seq1_6    | 1 | 4 | 0 | 0 | 0  |
| NRLnaseq                                                                                                                                                                                                                                                                                                                                                       | comp63200_c0_seq1_4    | 4 | 2 | 0 | 0 | 0  |
| NRLnaseq                                                                                                                                                                                                                                                                                                                                                       | comp94854_c0_seq1_4    | 0 | 4 | 0 | 0 | 0  |
| NRLnaseq                                                                                                                                                                                                                                                                                                                                                       | comp81141_c0_seq1_1 (+ | 0 | 0 | 4 | 0 | 0  |

42

43 Supplementary Table S1. Unique peptide count determined by Scaffold software for whole  
 44 cement samples prepared from various cement collection methods. Table shows a shared protein  
 45 composition among all collection methods, where roughly half of the protein IDs share more  
 46 than 4 peptides.

47

| Identified Proteins                                                                                                                                | Accession Number             | Coverslip |        | Gummy    |              | Microsphere |      |     |
|----------------------------------------------------------------------------------------------------------------------------------------------------|------------------------------|-----------|--------|----------|--------------|-------------|------|-----|
|                                                                                                                                                    |                              | NRL       | NRLmod | NRLnomod | NRLTrypChymo | BioP        | BioP | NRL |
| NRLnaseq, ***** No hits found *****                                                                                                                | comp41238_c0_seq1_4          | 9         | 12     | 14       | 14           | 12          | 14   | 18  |
| NRLnaseq,gb AFY13482.1  MULTIFUNCIN [Chthamalus fissus]                                                                                            | comp48163_c0_seq1_4          | 0         | 2      | 15       | 23           | 0           | 2    | 0   |
| Aacp19k                                                                                                                                            | Aacp19k(+1)                  | 0         | 4      | 6        | 7            | 0           | 1    | 0   |
| NRLnaseq,***** No hits found *****                                                                                                                 | comp47308_c0_seq1_4          | 0         | 6      | 0        | 0            | 0           | 3    | 12  |
| NRLnaseq,dbj BAE94409.1  cement protein-19k [Megabalanus rosa]                                                                                     | comp40515_c0_seq1_5          | 0         | 4      | 4        | 5            | 0           | 4    | 4   |
| NRLnaseq,ref XP_014478061.1  PREDICTED: basement membrane-specific<br>heparan sulfate proteoglycan core protein isoform X6 [Dinoponera quadriceps] | comp44361_c2_seq5_2(+1)      | 20        | 0      | 0        | 0            | 0           | 0    | 0   |
| NRLnaseq,dbj BAE94410.1  cement protein-19k, partial [Fistulobalanus<br>albicostatus]                                                              | comp45928_c1_seq1_6          | 0         | 3      | 0        | 2            | 0           | 3    | 9   |
| Aacp100k-1                                                                                                                                         | Aacp100k-1(+1)               | 1         | 0      | 1        | 0            | 0           | 1    | 8   |
| NRLnaseq,ref XP_001960248.1  uncharacterized protein Dana_GF11619,lysyl<br>oxidase?[Drosophila ananassae]                                          | comp44772_c0_seq1_4          | 0         | 6      | 1        | 1            | 1           | 1    | 1   |
| NRLnaseq, ref XP_012246550.1  PREDICTED: papilin isoform X3 [Bombus<br>impatiens]                                                                  | comp46330_c0_seq1_6          | 0         | 7      | 0        | 1            | 0           | 1    | 2   |
| NRLnaseq,ref XP_002072489.2  uncharacterized protein Dwil_GK12466<br>[Drosophila willistonii]                                                      | comp46953_c1_seq1_5(+1)      | 6         | 0      | 0        | 0            | 0           | 0    | 0   |
| NRLnaseq,ref XP_012262935.1  PREDICTED: hemocytin [Athalia rosae]                                                                                  | comp81481_c0_seq1_6          | 8         | 0      | 0        | 0            | 0           | 0    | 0   |
| NRLnaseq,ref XP_011640591.1  PREDICTED: basement membrane-specific<br>heparan sulfate proteoglycan core protein isoform                            | comp43075_c0_seq1_4          | 9         | 0      | 0        | 0            | 0           | 0    | 0   |
| CYPRIDJPR2013,ref XP_012283862.1  PREDICTED: serine protease 42-like isoform<br>X2 [Orussus abietinus]                                             | CL200.Contig3_Ba_mix (+3)    | 4         | 0      | 0        | 0            | 0           | 0    | 0   |
| Shell,ref XP_002036473.1GM11791[Drosophilasechellia]                                                                                               | CL1641.Contig1_Ba_mix_5 (+2) | 5         | 0      | 0        | 0            | 0           | 0    | 0   |

48

49 Supplementary Table S2. Number of unique peptides detected from band analysis of 63 kDa  
 50 showing GSrCP-AA43-1 (protein ID comp41238\_c0\_seq1\_4) to be the dominant protein across  
 51 bands collected from various samples and digest conditions.

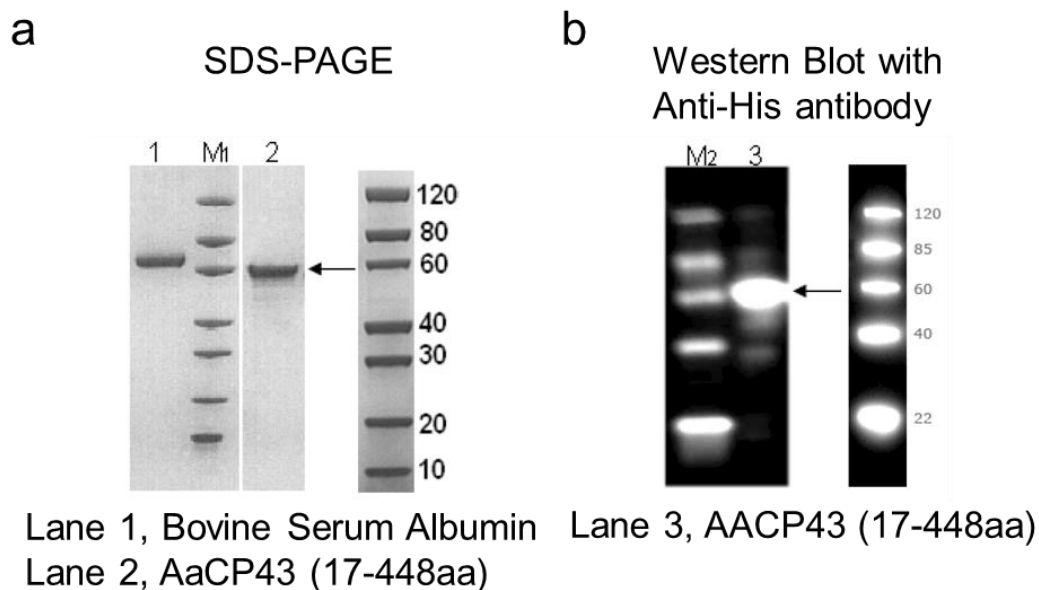

**c**

|            |            |            |            |             |            |
|------------|------------|------------|------------|-------------|------------|
| 10         | 20         | 30         | 40         | 50          | 60         |
| MHHHHHHENL | YFQGAPAPGV | TPPVSPPLPP | VPPPLPPKRA | ATDADAVTVG  | TLKTAGTAIG |
| 70         | 80         | 90         | 100        | 110         | 120        |
| KSSGGAVSLE | QTADQGSKAG | VKVDLYSQRA | GATEGSAAST | SATKVKCKPG  | FSKGASVTGQ |
| 130        | 140        | 150        | 160        | 170         | 180        |
| QTSGASVGEA | TSTSDATGEA | GTICDDTKSD | VQGGASTSTI | SDGKAASEAL  | NTAASETLTV |
| 190        | 200        | 210        | 220        | 230         | 240        |
| PGGSSTVSNA | NSKTGGTSSG | SAGTDAAGKA | SSRGIGDGT  | SRADSQTKTS  | TTGDGRSEAD |
| 250        | 260        | 270        | 280        | 290         | 300        |
| QRSTGTGTTG | RKRGALGAET | SAQTTGSSAT | VGGGSDSKGE | SSAGGTANQG  | SNVAAESDSN |
| 310        | 320        | 330        | 340        | 350         | 360        |
| QKIRSTRTGS | SAVDAKSGSA | AALGAIKDKL | VGKSDAASGG | SAESVGSAAKT | DFNTGGSAGH |
| 370        | 380        | 390        | 400        | 410         | 420        |
| SAGEGSGFAE | TSVGGQTRQT | GAVEGSQTSS | ASGSVTLKRP | VWPCRLPSKA  | PKDWLHGWWP |
| 430        | 440        |            |            |             |            |
| GTKLVWHCVF | PHKIPAKYSQ | LYKPKW     |            |             |            |

Molecular Weight: 43721.4  
pI: 9.10

52

53 Supplementary Figure S2. Characterization of recombinant AaCP43 (17-448aa) protein. a) SDS-  
54 PAGE of purified His-AaCP43 protein running at 60 kDa, b) Western Blot of His-AaCP43 with  
55 anti-His antibody, and c) Full amino acid sequence of expressed product His-AaCP43.

56

57

58 **Recombinant Protein Expression.** Synthetic gene construct of the AaCP43 (17-448aa) coding  
59 region (Supplementary Figure S2) was designed and synthesized by Genscript (Piscataway, NJ)  
60 with a 6xHis tag as well as the removal of a 16 residue N-terminal transport sequence. The  
61 AaCP43 construct was subcloned into pET30a for expression in *E. coli* at Genscript facilities. *E.*  
62 *coli* strain BL21 (DE3) was transformed with the recombinant plasmid product. A single colony  
63 was then inoculated into LB medium containing antibiotics and cultures were incubated at 37 °C  
64 while shaking at 200 rpm overnight. IPTG was introduced into 1 L of TB culture when OD<sub>600</sub>  
65 was between 0.5 and 1.0 to induce overexpression. Cells were harvested and pelleted by  
66 centrifugation. Cell pellets were lysed by sonication and inclusion bodies of insoluble AaCP43  
67 were dissolved in 6M urea before purification. Pure AaCP43 was obtained using a two-step  
68 method; an affinity purification step on Ni resin was followed by gel filtration step on a  
69 Superdex 200 column. Fractions were pooled, refolded in PBS, and sterilized using a 0.22 µm  
70 filter. Proteins were analyzed by SDS-PAGE and Western blot using a mouse anti-His mAb  
71 (Genscript, A00186).

72

73

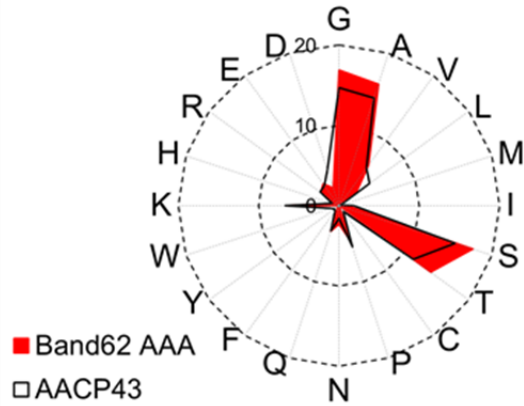

| AA    | Background |       | 62KD Band |       | Background Subtract |        | AACP43       |
|-------|------------|-------|-----------|-------|---------------------|--------|--------------|
|       | pmol       | %     | pmol      | %     | pmol                | %      | Transcript % |
| Asx   | 28.39      | 4.68  | 60.88     | 4.65  | 32.49               | 4.63   | 6.3          |
| Ser   | 45.44      | 7.49  | 168.32    | 12.86 | 122.88              | 17.50  | 15.2         |
| Glx   | 64.61      | 10.66 | 111.84    | 8.55  | 47.24               | 6.73   | 6.4          |
| Gly   | 63.60      | 10.49 | 182.35    | 13.93 | 118.76              | 16.91  | 14.7         |
| His   | 8.61       | 1.42  | 14.57     | 1.11  | 5.96                | 0.85   | 0.9          |
| Arg   | 23.92      | 3.94  | 43.72     | 3.34  | 19.80               | 2.82   | 6.7          |
| Thr   | 29.33      | 4.84  | 128.34    | 9.81  | 99.01               | 14.10  | 11.4         |
| Ala   | 40.49      | 6.68  | 152.16    | 11.63 | 111.67              | 15.90  | 14.1         |
| Pro   | 62.46      | 10.30 | 94.84     | 7.25  | 32.38               | 4.61   | 5.4          |
| Cys   | 0.00       | 0.00  | 0.00      | 0.00  | 0.00                | 0.00   | 0.9          |
| Tyr   | 94.89      | 15.65 | 93.17     | 7.12  | -1.73               | -0.25  | 0.7          |
| Val   | 29.04      | 4.79  | 72.90     | 5.57  | 43.86               | 6.24   | 5.8          |
| Met   | 7.77       | 1.28  | 5.48      | 0.42  | -2.29               | -0.33  | 0.2          |
| Lys   | 30.62      | 5.05  | 75.28     | 5.75  | 44.67               | 6.36   | 6.7          |
| Ile   | 20.36      | 3.36  | 27.08     | 2.07  | 6.72                | 0.96   | 1.8          |
| Leu   | 40.50      | 6.68  | 58.73     | 4.49  | 18.22               | 2.59   | 4.7          |
| Phe   | 16.28      | 2.68  | 19.02     | 1.45  | 2.74                | 0.39   | 0.9          |
| Trp   | 0.00       | 0.00  | 0.00      | 0.00  | 0.00                | 0.00   | 1.1          |
| Total | 606.29     | 100   | 1308.66   | 100   | 702.37              | 100.00 | 100          |

74

75

76 Supplementary Figure S3. Amino acid analysis of 63 kDa PAGE band, showing high similarity  
 77 with the theoretical composition of GSrCP-AA43-1 based on translated mRNA sequence.  
 78 Experimental: Blank strip contained 13.7 ugs while 62kD protein strip contained 26.7 ugs as  
 79 determined by hydrolysis and absorbance intensity of derivitized amino acids upon separation by  
 80 HPLC.

81

82

83

```

1 ATGCTGCCTGCCGG ATCCTTCTCTCTCC CTGGGTGCGGGGCTA TCGGCGCCTGCCCC GGAGTGACGCCGCC
1 M L P A A I L L L S L G A A L S A P A P G V T P P
76 GTTTCTCCACCTCTA CCGCCCGTTTCTCCA CCTCTTCCACCGAAG AGGGCTGCCACAGAC GCCGATGCGGTGACT
26 V S P P L P P V P P P L P P K R A A T D A D A V T
151 GTTGGTACGCTCAAG ACCGCAGGTACCGCC ATTGGTAAGTCTCTCA GGTGGAGCTGTCTCT CTGGAGCAGACTGCC
51 V G T L K T A G T A I G K S S G G A V S L E Q T A
226 GATCAGGGAAGCAAA GCTGGAGTCAAGGTT GATCTCTACTCGCAG AGGGCGGGAGCTACG GAGGGAAGCGCCGCC
76 D Q G S K A G V K V D L Y S Q R A G A T E G S A A
301 TCCACCAGCGCGACC AAAGTCAAGTGAAG CCTGGCTTCAAGCAAG GGGCGAGTGTGACC GGCCAGCAGACGAGC
101 S T S A T K V K C K P G F S K G A S V T G Q Q T S
376 GGCGCAAGTGTCCGGC GAGGCGACGTCGACC TCCGACGCCACGGGA GAGGCGGGAACCATC TGCGACGATACCAAG
126 G A S V G E A T S T S D A T G E A G T I C D D T K
451 TCTGATGTCCAGGGA GGTGCCAGTACCTCC ACCATCAGCGACGGC AAGGCAGCTTCTGAG GCGCTCAACACCGCC
151 S D V Q G G A S T S T I S D G K A A S E A L N T A
526 GCCTCCGAAACGTTG ACGGTTCCCGGAGGA TCCAGCACAGTCTCC AATGCCAACTCGAAG ACCGGGGGTACCTCC
176 A S E T L T V P G G S S T V S N A N S K T G G T S
601 TCAGGATCCGCCGGA ACCGACGCAGCTGGC AAGGCTTCCAGTCGG GGAATCGGTGACGGC ACAACGTCACGTGCA
201 S G S A G T D A A G K A S S R G I G D G T T S R A
676 GATTCTCAAACGAAG ACATCGACGACAGGC GACGGAAGGAGCGAG GCTGACCAGCGCTCC ACCGGTACCGGAACC
226 D S Q T K T S T T G D G R S E A D Q R S T G T G T
751 ACAGGTCCGAAACGT GGGGCGCTCGGTGCC GAGACTTCTGCACAG ACCACGGGTAGTTCC GCAACCGTAGGAGGA
251 T G R K R G A L G A E T S A Q T T G S S A T V G Q
826 GGATCAGATAGCAAG GGCGAGTCTCCGCT GGAGGTACAGCCAAC CAGGGCTCCAACGTC GCCCGTGTAGTCAGAC
276 G S D S K G E S S A G G T A N Q G S N V A A E S D
901 TCCAATCAAAAGATC AGATCAACGAGGACT GGTAGTCCGCGGTG GATGCCAAGAGCGGC TCCGCTGCAGCGCTG
301 S N Q K I R S T R T G S S A V D A K S G S A A A L
976 GGTGCCATCAAAGAC AAATCGTCCGAAAG AGTGACGCAGCTTCA GGAGGCAGCGCCGAG TCGGTCCGGTAGCGCC
326 G A I K D K L V G K S D A A S G G S A E S V G S A
1051 AAGACCGATTTCAAC ACCGGAGGTTCCGGCT GGCCACTCGGCAGGG GAGGGCAGCGGTTTC GCCGAGACCTCTGTC
351 K T D F N T G G S A G H S A G E G S G F A E T S V
1126 GGCGGTCCAGACGCGT CAGACCGGTGCAGTC GAGGGAAGCCAGACA TCTAGCGCCAGCGGA AGCGTCACACTGAAA
376 G G Q T R Q T G A V E G S Q T S S A S G S V T L K
1201 CGGCCTGTCTGGCCA TGCAGGCTCCCCAGC AAAGCGCCCAAAGAC TGGCTGCATGGCTGG GTGCCCGATACTAAA
401 R P V W P C R L P S K A P K D W L H G W V P D T K
1276 TTGGTGTGGCTTGT GTATTCCCTCACAAA ATACCCGCCAAGTAC AGCCAACGTATAAAG CCTAAATGGTAG
426 L V W P C V F P H K I P A K Y S Q L Y K P K W *

```

84

85

86 Supplementary Figure S4. GSrCP-AA43-1 RNA and translated amino acid sequences as verified  
87 by PCR. Three nucleotide mismatches between theoretical and mRNA are outlined in red.

88

89

90

91

92

93

94

95



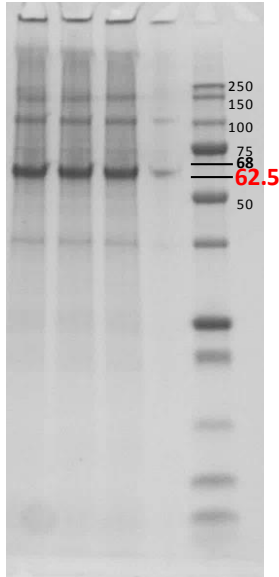

| Microsphere            |          |        |                          |       |               |        |         |           |                                     |                   |                 |               |
|------------------------|----------|--------|--------------------------|-------|---------------|--------|---------|-----------|-------------------------------------|-------------------|-----------------|---------------|
| PAGE MW                | Facility | Enzyme | Transcript Entry #       | Score | Transcript MW | pI     | GRAVY   | Aliphatic | CP Name                             | Sequence Homology | NCBI Annotation |               |
| 100                    | BioP     | mix    | 1::comp27593_c0_seq1_5   | 128   | 21877         |        |         |           | 43-like                             | 43                |                 |               |
|                        |          |        | 1::comp56597_c0_seq1_4   | 103   | 31196         |        |         |           |                                     |                   |                 |               |
|                        |          |        | 2::CL6240.Contig1_Ba_mix | 102   | 60346         |        |         |           |                                     |                   |                 |               |
|                        |          |        | 1::comp44772_c0_seq1_4   | 92    | 76364         |        |         |           |                                     |                   |                 |               |
|                        |          |        | 1::comp33562_c0_seq1_3   | 88    | 16370         |        |         |           |                                     | 52-like           | 52              | Lysyl Oxidase |
|                        |          |        | 2::CL3592.Contig1_Ba_mix | 82    | 41791         |        |         |           |                                     |                   |                 |               |
|                        |          |        | 1::comp45928_c1_seq1_6   | 73    | 134253        | -0.702 | 56.12   | AACP48    | 19                                  |                   |                 |               |
| 1::comp27343_c0_seq1_4 | 69       | 28183  |                          |       |               |        | 43-like | 43        | cross-beta structure silk protein 1 |                   |                 |               |
| 100                    | NRL      | Tryp   | 1::comp41238_c0_seq1_4   | 642   | 62160         |        | -0.423  | 56.14     | AACP43                              | 43                |                 |               |
|                        |          |        | 1::comp47308_c0_seq1_4   | 143   | 76040         |        | -0.519  | 71.46     | AACP57                              | 57                |                 |               |
|                        |          |        | AACP100k-1               | 57    | 114124        |        |         |           | AACP100                             | 100               |                 |               |
| 62.5                   | NRL      | Tryp   | 1::comp41238_c0_seq1_4   | 1689  | 62160         |        | -0.423  | 56.14     | AACP43                              | 43                |                 |               |
|                        |          |        | 1::comp47308_c0_seq1_4   | 384   | 76040         |        | -0.519  | 71.46     | AACP57                              | 57                |                 |               |
|                        |          |        | 1::comp45928_c1_seq1_6   | 223   | 134253        |        | -0.702  | 56.12     | AACP48                              | 19                |                 |               |
|                        |          |        | 1::comp40515_c0_seq1_5   | 220   | 70957         |        | -0.387  | 67.65     | AACP45                              | 19                |                 |               |
|                        |          |        | AACP100k-1               | 104   | 114124        |        | 0.178   | 117.08    | AACP100                             | 100               |                 |               |
|                        |          |        | 1::comp46330_c0_seq1_6   | 78    | 56017         |        | -0.515  | 62.34     | AACP38                              | 19                |                 |               |
| 62.5                   | BioP     | mix    | 1::comp41238_c0_seq1_4   | 1360  | 62160         |        | -0.423  | 56.14     | AACP43                              | 43                |                 |               |
|                        |          |        | 1::comp47087_c0_seq1_6   | 841   | 9117          |        |         |           |                                     |                   |                 |               |
|                        |          |        | 1::comp46330_c0_seq1_6   | 211   | 56017         |        | -0.515  | 62.34     | AACP38                              | 19                |                 |               |
|                        |          |        | 2::Aacp19k               | 208   | 20154         |        | 0.013   | 92.17     | AACP19                              | 19                |                 |               |
|                        |          |        | 1::comp47308_c0_seq1_4   | 196   | 76040         |        | -0.519  | 71.46     | AACP57                              | 57                |                 |               |
|                        |          |        | 1::comp45928_c1_seq1_6   | 153   | 134253        |        | -0.702  | 56.12     | AACP48                              | 19                |                 |               |
|                        |          |        | 1::comp40515_c0_seq1_5   | 140   | 70957         |        | -0.387  | 67.65     | AACP45                              | 19                |                 |               |
|                        |          |        | 1::comp44772_c0_seq1_4   | 130   | 76364         |        |         |           |                                     |                   |                 |               |
|                        |          |        | 1::comp97185_c0_seq1_2   | 107   | 37285         |        |         |           |                                     |                   |                 |               |
|                        |          |        |                          |       |               |        |         |           |                                     |                   |                 | Lysyl Oxidase |

97

98 Supplementary Table S3. Band-based sequencing analysis of cement proteins from glass  
 99 microspheres.

100

101

102

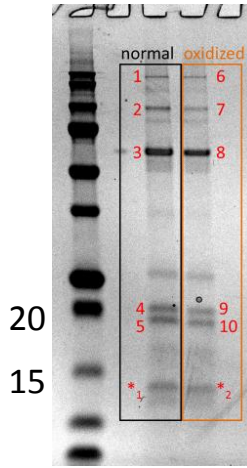

| Gummy   |          |           |                         |       |               |        |       |           |         |                     |                              |  |
|---------|----------|-----------|-------------------------|-------|---------------|--------|-------|-----------|---------|---------------------|------------------------------|--|
| PAGE MW | Facility | Enzyme    | Transcript Entry #      | Score | Transcript MW | pI     | GRAVY | Aliphatic | CP Name | Sequence Homology   | NCBI Annotation              |  |
| 250     | NRL      | Tryp      | 1::comp48163_c0_seq1_4  | 534   | 182231        |        |       |           |         |                     | SIPC                         |  |
|         |          |           | 1::comp101217_c0_seq1_1 | 139   | 19431         |        |       |           |         |                     | SIPC                         |  |
|         |          |           | 1::comp41238_c0_seq1_4  | 92    | 62160         | -0.423 | 56.14 | AACP43    | 43      |                     |                              |  |
| 62.5    | NRL      | Tryp      | 1::comp48163_c0_seq1_4  | 518   | 182231        |        |       |           |         |                     | SIPC                         |  |
|         |          |           | 1::comp41238_c0_seq1_4  | 3109  | 62160         | -0.423 | 56.14 | AACP43    | 43      |                     |                              |  |
|         |          |           | 1::comp40515_c0_seq1_5  | 171   | 70957         | -0.387 | 67.65 | AACP45    | 19      |                     |                              |  |
|         |          |           | 1::comp46330_c0_seq1_6  | 69    | 56017         | -0.515 | 62.34 | AACP38    | 19      |                     |                              |  |
|         |          |           | 1::comp35623_c0_seq1_3  | 62    | 35040         |        |       |           |         |                     |                              |  |
| 62.5    | NRL      | Tryp      | 1::comp47087_c0_seq1_6  | 60    | 9117          |        |       |           |         |                     |                              |  |
|         |          |           | 1::comp41238_c0_seq1_4  | 1575  | 62160         | -0.423 | 56.14 | AACP43    | 43      |                     |                              |  |
|         |          |           | 1::comp40515_c0_seq1_5  | 177   | 70957         | -0.387 | 67.65 | AACP45    | 19      |                     |                              |  |
| 62.5    | BioP     | mix       | 1::comp44772_c1_seq1_2  | 89    | 16625         |        |       |           |         |                     | Neurotrypsin/Serine Protease |  |
|         |          |           | 1::comp41238_c0_seq1_4  | 2884  | 62160         | -0.423 | 56.14 | AACP43    | 43      |                     |                              |  |
|         |          |           | 1::comp49909_c1_seq1_6  | 217   | 34116         |        |       | 43-like   | 43      |                     |                              |  |
|         |          |           | 1::comp39288_c0_seq1_5  | 158   | 114121        |        |       |           |         |                     |                              |  |
|         |          |           | 1::comp45426_c4_seq1_5  | 132   | 10903         |        |       |           |         |                     |                              |  |
|         |          |           | 1::comp27593_c0_seq1_5  | 128   | 21877         |        |       | 43-like   | 43      |                     |                              |  |
|         |          |           | 1::comp47308_c0_seq1_4  | 122   | 76040         | -0.519 | 71.46 | AACP57    | 57      |                     |                              |  |
|         |          |           | 1::comp45928_c1_seq1_6  | 86    | 134253        | -0.702 | 56.12 | AACP48    | 19      |                     |                              |  |
|         |          |           | 1::comp46137_c1_seq5_5  | 85    | 49470         |        |       |           |         |                     |                              |  |
|         |          |           | 1::comp45999_c0_seq1_4  | 81    | 62231         |        |       |           |         |                     |                              |  |
| 62.5    | NRL      | Tryp/Chym | 1::comp40515_c0_seq1_5  | 76    | 70957         | -0.387 | 67.65 | AACP45    | 19      |                     |                              |  |
|         |          |           | 1::comp41238_c0_seq1_4  | 496   | 62160         | -0.423 | 56.14 | AACP43    | 43      |                     |                              |  |
| 20      | NRL      | Tryp      | 1::comp65098_c0_seq1_5  | 67    | 38746         |        |       |           |         |                     |                              |  |
|         |          |           | 1::comp41238_c0_seq1_4  | 564   | 62160         | -0.423 | 56.14 | AACP43    | 43      |                     |                              |  |
| 20      | NRL      | Tryp      | 2::Aacp19k              | 572   | 20154         | 0.013  | 92.17 | AACP19    | 19      |                     |                              |  |
| 20      | NRL      | Tryp      | 2::Aacp19k              | 1443  | 20154         | 0.013  | 92.17 | AACP19    | 19      |                     |                              |  |
| 20      | NRL      | Tryp      | 1::comp148424_c0_seq1_1 | 65    | 9471          |        |       |           |         |                     |                              |  |
|         |          |           | 2::Aacp19k              | 227   | 20154         | 0.013  | 92.17 | AACP19    | 19      |                     |                              |  |
| 20      | NRL      | Tryp      | 2::Aacp19k              | 750   | 20154         | 0.013  | 92.17 | AACP19    | 19      |                     |                              |  |
| 14      | NRL      | Tryp      | 1::comp47369_c0_seq1_5  | 174   | 25169         |        |       |           |         | Whey Acidic Protein |                              |  |
| 14      | NRL      | Tryp      | 1::comp65098_c0_seq1_5  | 55    | 38746         |        |       |           |         |                     |                              |  |
| 14      | NRL      | Tryp/Chym | 1::comp58019_c0_seq1_1  | 55    | 97596         |        |       |           |         |                     |                              |  |
|         |          |           | 1::comp129458_c0_seq1_5 | 53    | 8915          |        |       |           |         |                     |                              |  |
| 14      | NRL      | Tryp/Chym | 1::comp65098_c0_seq1_5  | 55    | 38746         |        |       |           |         |                     |                              |  |

103

104 Supplementary Table S4. Band-based sequencing analysis of cement proteins from 'opaque'  
 105 glue.

106

107

108

109

110

111

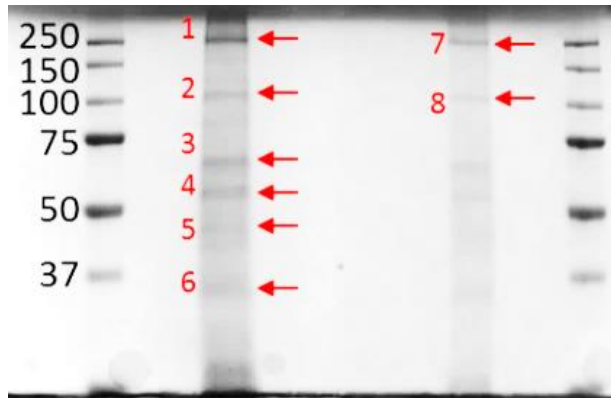

112

113

Figure for Supplementary Table S5. Bands excised for proteomic analysis.

# Plaque

| PAGE MW                | Facility          | Enzyme | Transcript Entry #      | Database          | Score | Transcript MW          | CP Name           | Sequence Homology |        |        |    |
|------------------------|-------------------|--------|-------------------------|-------------------|-------|------------------------|-------------------|-------------------|--------|--------|----|
| 250                    | NRL               | Tryp   | 1::comp48163_c0_seq1_4  | barnacleRNAseqall | 2381  | 182231                 |                   |                   |        |        |    |
|                        |                   |        | 1::comp39924_c0_seq1_5  | barnacleRNAseqall | 348   | 227597                 |                   |                   |        |        |    |
|                        |                   |        | 2::Aacp100k-1           | barnNRLandDuke    | 231   | 114124                 | AACP100           | 100               |        |        |    |
|                        |                   |        | 1::comp122409_c0_seq1_6 | barnacleRNAseqall | 65    | 9583                   |                   |                   |        |        |    |
|                        |                   |        | 1::comp40644_c0_seq1_4  | barnacleRNAseqall | 65    | 174829                 | AACP105           | 105               |        |        |    |
|                        |                   |        | 1::comp46070_c0_seq2_1  | barnacleRNAseqall | 64    | 86334                  |                   |                   |        |        |    |
|                        |                   |        | 1::comp45011_c0_seq2_6  | barnacleRNAseqall | 60    | 63948                  |                   |                   |        |        |    |
| 250                    | NRL               | Tryp   | 1::comp48163_c0_seq1_4  | barnacleRNAseqall | 1869  | 182231                 |                   |                   |        |        |    |
|                        |                   |        | 1::comp39924_c0_seq1_5  | barnacleRNAseqall | 188   | 227597                 |                   |                   |        |        |    |
|                        |                   |        | 2::Aacp100k-1           | barnNRLandDuke    | 128   | 114124                 | AACP100           | 100               |        |        |    |
|                        |                   |        | 1::comp30989_c1_seq1_3  | barnacleRNAseqall | 62    | 41834                  |                   |                   |        |        |    |
| 100                    | NRL               | Tryp   | 1::comp25045_c1_seq1_2  | barnacleRNAseqall | 48    | 534529                 |                   |                   |        |        |    |
| 100                    | NRL               | Tryp   | 1::comp40644_c0_seq1_4  | barnacleRNAseqall | 456   | 174829                 | AACP105           | 105               |        |        |    |
|                        |                   |        | 1::comp45999_c0_seq1_4  | barnacleRNAseqall | 127   | 62231                  |                   |                   |        |        |    |
|                        |                   |        | 2::Aacp100k-1           | barnNRLandDuke    | 123   | 114124                 | AACP100           | 100               |        |        |    |
|                        |                   |        | 1::comp84481_c0_seq1_4  | barnacleRNAseqall | 67    | 40630                  |                   |                   |        |        |    |
| 66.6                   | NRL               | Tryp   | 1::comp45928_c1_seq1_6  | barnacleRNAseqall | 1035  | 134253                 | AACP48            | 19                |        |        |    |
|                        |                   |        | 1::comp41238_c0_seq1_4  | barnacleRNAseqall | 588   | 62160                  | AACP43            | 43                |        |        |    |
|                        |                   |        | 1::comp40644_c0_seq1_4  | barnacleRNAseqall | 230   | 174829                 | AACP105           | 105               |        |        |    |
|                        |                   |        | 1::comp40515_c0_seq1_5  | barnacleRNAseqall | 140   | 70957                  | AACP45            | 19                |        |        |    |
|                        |                   |        | 1::comp45011_c0_seq2_6  | barnacleRNAseqall | 92    | 63948                  |                   |                   |        |        |    |
|                        |                   |        | 1::comp48163_c0_seq1_4  | barnacleRNAseqall | 91    | 182231                 |                   |                   |        |        |    |
|                        |                   |        | 1::comp39288_c0_seq1_5  | barnacleRNAseqall | 91    | 114121                 |                   |                   |        |        |    |
|                        |                   |        | 1::comp48863_c0_seq1_5  | barnacleRNAseqall | 90    | 17634                  |                   |                   |        |        |    |
|                        |                   |        | 1::comp43534_c0_seq2_4  | barnacleRNAseqall | 88    | 54116                  |                   |                   |        |        |    |
|                        |                   |        | 1::comp47983_c0_seq1_6  | barnacleRNAseqall | 88    | 52983                  |                   |                   |        |        |    |
|                        |                   |        | 1::comp56597_c0_seq1_4  | barnacleRNAseqall | 75    | 31196                  |                   |                   |        |        |    |
|                        |                   |        | 1::comp87868_c0_seq1_2  | barnacleRNAseqall | 71    | 9478                   |                   |                   |        |        |    |
|                        |                   |        | 1::comp27343_c0_seq1_4  | barnacleRNAseqall | 65    | 28183                  | 43-like           | 43                |        |        |    |
|                        |                   |        | 1::comp44772_c0_seq1_4  | barnacleRNAseqall | 62    | 76364                  |                   |                   |        |        |    |
|                        |                   |        | 58.3                    | NRL               | Tryp  | 1::comp41238_c0_seq1_4 | barnacleRNAseqall | 2742              | 62160  | AACP43 | 43 |
| 1::comp45928_c1_seq1_6 | barnacleRNAseqall | 221    |                         |                   |       | 134253                 | AACP48            | 19                |        |        |    |
| 1::comp45011_c0_seq2_6 | barnacleRNAseqall | 174    |                         |                   |       | 63948                  |                   |                   |        |        |    |
| 1::comp48220_c0_seq1_6 | barnacleRNAseqall | 147    |                         |                   |       | 54867                  | 52-like           | 52                |        |        |    |
| 1::comp40644_c0_seq1_4 | barnacleRNAseqall | 133    |                         |                   |       | 174829                 | AACP105           | 105               |        |        |    |
| 1::comp44772_c0_seq1_4 | barnacleRNAseqall | 116    |                         |                   |       | 76364                  |                   |                   |        |        |    |
| 1::comp27593_c0_seq1_5 | barnacleRNAseqall | 112    |                         |                   |       | 21877                  | 43-like           | 43                |        |        |    |
| 1::comp39288_c0_seq1_5 | barnacleRNAseqall | 103    |                         |                   |       | 114121                 |                   |                   |        |        |    |
| 1::comp27704_c0_seq1_6 | barnacleRNAseqall | 89     |                         |                   |       | 53067                  |                   |                   |        |        |    |
| 1::comp43534_c0_seq2_4 | barnacleRNAseqall | 77     |                         |                   |       | 54116                  |                   |                   |        |        |    |
| 1::comp45999_c0_seq1_4 | barnacleRNAseqall | 67     |                         |                   |       | 62231                  |                   |                   |        |        |    |
| 1::comp27343_c0_seq1_4 | barnacleRNAseqall | 65     |                         |                   |       | 28183                  | 43-like           | 43                |        |        |    |
| 1::comp49909_c1_seq1_6 | barnacleRNAseqall | 59     |                         |                   |       | 34116                  | 43-like           | 43                |        |        |    |
| 43.5                   | NRL               | Tryp   |                         |                   |       | 1::comp48163_c0_seq1_4 | barnacleRNAseqall | 1869              | 182231 |        |    |
|                        |                   |        |                         |                   |       | 1::comp39924_c0_seq1_5 | barnacleRNAseqall | 188               | 227597 |        |    |
|                        |                   |        | 2::Aacp100k-1           | barnNRLandDuke    | 128   | 114124                 | AACP100           | 100               |        |        |    |
|                        |                   |        | 1::comp30989_c1_seq1_3  | barnacleRNAseqall | 62    | 41834                  |                   |                   |        |        |    |
|                        |                   |        | 1::comp84481_c0_seq1_4  | barnacleRNAseqall | 59    | 40630                  |                   |                   |        |        |    |
| 30                     | NRL               | Tryp   | 1::comp40644_c0_seq1_4  | barnacleRNAseqall | 456   | 174829                 | AACP105           | 105               |        |        |    |
|                        |                   |        | 1::comp45999_c0_seq1_4  | barnacleRNAseqall | 127   | 62231                  |                   |                   |        |        |    |
|                        |                   |        | 2::Aacp100k-1           | barnNRLandDuke    | 123   | 114124                 | AACP100           | 100               |        |        |    |
|                        |                   |        | 1::comp84481_c0_seq1_4  | barnacleRNAseqall | 67    | 40630                  |                   |                   |        |        |    |

114

115 Supplementary Table S5. Band-based sequencing analysis of cement proteins from 3-day cover  
 116 slip transfer.

117

# amphitrite LOX vs. Drosophila melanogaster LOX

|       |     | SRCR domain 1                                                 |     |
|-------|-----|---------------------------------------------------------------|-----|
| Query | 53  | FTSLFGQRQFSVRLVGGNSREGNVEVLIYGSRGVVGWRSVCDIGWTTAHAEAVCRQLG    | 112 |
|       |     | +T + + + +RLVGG N EGN+EVL G W +VCD W + A+ VCRQLG              |     |
| Sbjct | 50  | YTKVLNKEEGAIRLVGGDNEYEGNIEVLHNGK-----WGAVCDEWDSTEADIVCRQLG    | 103 |
| Query | 113 | FPGPAVATRHGRFGFRSTGTGTMSVNCQVGAGGRGLRDCFYRGVGTTEGSCNSDNVAGVI  | 172 |
|       |     | FPG TR G FG + N + L DC + G G E C AGV+                         |     |
| Sbjct | 104 | FPGMRRYTRSGFFG--PARRRFWMDNLFCEGHEQELVDCHFEGWG--ENDCEPGEAAGVV  | 159 |
| Query | 173 | CGFD-----PSSPYGGR--MDVRLRGGGTR--GDVEVRYGGRGWGPVC              | 211 |
|       |     | C P P P R + VRLRGG +R G VEV G WG VC                           |     |
| Sbjct | 160 | CYPPENALIPMATPIIRDEDLPKYPIHSRSRLYVRLRGGRSRIEGRVEVSLDGGRWGSVC  | 219 |
| Query | 212 | GDGFDVKDAMVVCRLSLGAAKSY---ISGRRASGEFILAGVECSGRETSLAQCRSERG    | 268 |
|       |     | DG+ + +A VVCRQL LG A +++ G +L+G EC G ET LA C                  |     |
| Sbjct | 220 | ADGWSLLEANVVCRLGGLGYASEAFQTDFFGGFNVSRLVLSGSECYGNETELADCLHHDA  | 279 |
| Query | 269 | DS--VRCAGNQFSGAAVEECAGQQSRDLPDLRVDAQELQDSAILTTETLGDLECALDENCL | 326 |
|       |     | + C GN+ AAV C PDL VD E++ +A L + ++CA++ENC+                    |     |
| Sbjct | 280 | SQGIISCHGNRQHVAVIC----DYIAPDLVVDYLEIEQTAHLEDPRMLLMQCAMEENCV   | 335 |
| Query | 327 | AKTAAEIKRREPTLWRTRTRKLFRTNKVWVWNGKADYRPRADPSQWEWHACHEHYHSEES  | 386 |
|       |     | A A +I+R +P WR R+R+L +FT N G AD+RP + SQWEWH CH H+HS E         |     |
| Sbjct | 336 | ANEAYQIQRDDPH-WRYRSRRLKFTAAAINAGNADFRPFKEKSQWEWHMCHMHFHSMEV   | 394 |
| Query | 387 | FSEYDLTYEGTDTKAAQGHKASFCLDSECRRGITQKYQCYIERGTRFPQGIKAGCADIY   | 446 |
|       |     | F+ +D+ + K AQQGHKASFCLDSE C G+ +KY C QGI C+D+Y                |     |
| Sbjct | 395 | FATFDI-FNLRGIKVAQGHKASFCLDSESNCLPGVAKKYNC----ANSGDQGISINCSDVY | 449 |
| Query | 447 | GSYIDCQWIDVTDIRSGKYVLRVRINADRVPEVSEFDDNQVICSVDLNLLEDETVRVTNCR | 506 |
|       |     | +DCQW+DVTD+ G YVL++ IN + KV E+++D+N IC DL RV NC+              |     |
| Sbjct | 450 | LYNLDCQWVDVTDLIPGTYYLKIAINPEFKVAEMNYDNNAIC--DLIYTANFARVQNCQ   | 507 |

SBJCT is Drosophila melanogaster

118

119 Supplementary Figure S5. Sequence alignment of *A. amphitrite* lysyl oxidase showing conserved  
 120 substrate binding sites as DmLOXL-2 from *D. melanogaster* .

121

## A. amphitrite Pxt vs. H. occidentalis Pxt

comp45999\_c0\_seq1\_4 peroxinectin N-term, Sbjct is KM384736 H. occidentalis

Query 183 RVQARAASAAPRTTRPPRVTRPPPLLTSSLRRIGIPTL -----PSFSPTNFRNVRAPRA 236  
 +++ AA TT+ P T+ P S +PT + P + + +

Sbjct 25 KLKSTAAPVQKLTTRKRPVTTKAPATTIKSPTVKSVPTTFVDTNSDEYDPIEAKKIYPFKT 84

Query 237 GLSIQGPVGVVCPEKPLNCNSGTPHRTYDGCNNLYQTHWGRRLRGLRRLFDSTYWDSVY 296  
 ++ P C C +R++DGSCNNL + WG RL Y D V

Sbjct 85 NEMLKPP---CCGRVIAACKKDDKYRSFDGSCNNLAHSDWGVPNATYSRLLPPVYSDGVR 141

Query 297 SPRIHSVAGGLLPSARLVSAQVMSSSSVQHQLFTTAV **TVFGQFADHD**LSISPIFHRSGGY 356  
 PR S LP AR V + + V++ + + +GQF HD+S+ F

Sbjct 142 LPR-RSTDKSP LPCARKVRTDLFPTGQVENGKWP LNIMYWGQFLAHDMSLLKDFD ----- 195

Query 357 GSTSPIECEPNHQFPAQPLHPQCFPIPVAAANDPFYKTNVVRCHNFVRSIPAPDPQCL -- 414  
 + CC + Q+ + C+PI + A+DP +RC NF R++ D C

Sbjct 196 ---GLVSCCTADGQY-QKNGRFCYPIKIPASDPTIGKAGIRCMNFTRTLTDKDMGCSVG 251

Query 415 PRPATQLND **TTWLDLS**QVYGSERQQARGLRTSTGGRLKTST -GNLL--PRQPPPSGEC- 470  
 PA QLN +T ++DLS VYG + AR LRT T G +KT GN + P +P + C

Sbjct 252 NAPAQQLNVTAY IDLSNVYGITDEIARSLRRTLNGEMKTEKRNKVFPPSEPKAANCP 311

Query 471 ----VSGICFLAG **DTRANENTLLTLLHTVLVREHNRVADRL** 507  
 +C+ GD+R+N+N L + + +REHNR+A L

Sbjct 312 CSTTSENVCYKTGDSRSNQNPQLAIQQIMFLREHNR LAKGL 352

comp27704\_c0\_seq1\_6 peroxinectin C-term, Sbjct is KM384736 H. occidentalis

Query 3 VWLREHNRVAAAALAAARHTSWSDERLYQQARRINIAQWQHIVYREWLP TIVG -FQYANS-- 59  
 ++LREHNR+A L + + W+DERLYQ+ARRINIA +Q+I Y EWLP ++G AN+

Sbjct 340 MFLREHNR LAKGLKSINPHWNDERLYQEARRINIAVYQYITYYEWLPILGDSNLANNKI 399

Query 60 --VGLRGFGRYTYTPALRPDI STEFSTA **AFR-LH**SLVQGVISLVTQHGT LQRQLKLTENY 116  
 + GF Y PDI+ E + AA+R H+ + G++ L+ Q + ++ +

Sbjct 400 IFPDIEGFVN -DYDSTKVPDITNEHAHAAYRQFHTQIAGMLQLMNSERQRQSTVPI SNWF 458

Query 117 FRPDSLVITSLFTNMARGMTQQR PQSFDRRFVQAVRGDLFKFG --AFGL **DLVAANIQR**GR 174  
 RP L + + GM QR + D FV+ + LF FG+DL A +IQR R

Sbjct 459 NRPQILESGTNIEQLTVGMVTQRVEESDNIFVEQITDKLFACQIGFGVDL KATDIQRDR 518

Query 175 DHALPTYATVAAACGSR SITGWFS FLSFMNWADVLRLKKVYAHWRD VDLFAGINLEKRAP 234  
 DHAL Y CG + W + F+ AD+ +LK +Y ++DVD+ G LE

Sbjct 519 DHALGYNDYRKFCGLKVAQSWEDYGFITPADI AKLKTLYKSYKDVDVSVGGGLEAIGE 578

Query 235 GAMVGPTARCVIADQFLRLRYGDRFFYDQAGQAGSFSWQQLQLRRSSMA RLLCDNVGAG 294  
 A VGPT C++ +QF R R DRF+++ F+ QL+++R+ S +RL CDN G G

Sbjct 579 -AQVGPTFLCILNEQFRRTQADR FWFENP --TSGFTLDQLREIRKGSSSRLFCDN -GDG 634

Query 295 FDSVQPLAFIRPIPLLPVVGCSYRIPKVDLS 327  
 +QPL+F+ P N V C I +DL+

Sbjct 635 ITKIQPLSFVLI FPGFNQPVPCS --EITAMDLT 665

122

123 Supplementary Figure S6. Sequence alignment of two peroxinectin proteins from *A. amphitrite*  
 124 showing conserved heme binding sites as *H. occidentalis*.

125

126

127

| Rank         | Description                                                                                      | Query Coverage | E value   | Identity | Accession      |
|--------------|--------------------------------------------------------------------------------------------------|----------------|-----------|----------|----------------|
| GSrCP-AA19-1 |                                                                                                  |                |           |          |                |
| 1            | 19 kDa cement protein [Amphibalanus amphitrite]                                                  | 1              | 7.00E-141 | 1        | AKZ20819.1     |
| 2            | cement protein-19k [Fistulobalanus albicostatus]                                                 | 0.85           | 2.00E-77  | 0.68     | BAE94410.1     |
| 3            | cement protein-19k [Balanus improvisus]                                                          | 0.85           | 3.00E-60  | 0.55     | BAE94411.1     |
| 4            | cement protein-19k [Megabalanus rosa]                                                            | 0.98           | 2.00E-59  | 0.51     | BAE94409.1     |
| AACP20-1     |                                                                                                  |                |           |          |                |
| 1            | cement protein 20 kDa-1 [Amphibalanus amphitrite]                                                | 0.92           | 7.00E-87  | 0.98     | AFX74689.1     |
| 2            | cement protein 20 kDa-3 [Amphibalanus amphitrite]                                                | 0.84           | 1.00E-40  | 0.59     | AFX74691.1     |
| 3            | cement protein 20 kDa-2 [Amphibalanus amphitrite]                                                | 0.91           | 2.00E-27  | 0.36     | AFX74690.1     |
| 4            | 20kDa-cement protein homologue [Fistulobalanus albicostatus]                                     | 0.86           | 7.00E-26  | 0.35     | BAF96022.1     |
| 5            | cement protein-20k [Megabalanus rosa]                                                            | 0.93           | 1.00E-10  | 0.27     | BAB18762.1     |
| AACP20-2     |                                                                                                  |                |           |          |                |
| 1            | cement protein 20 kDa-2 [Amphibalanus amphitrite]                                                | 1              | 1.00E-106 | 0.91     | AFX74690.1     |
| 2            | 20kDa-cement protein homologue [Fistulobalanus albicostatus]                                     | 0.96           | 3.00E-46  | 0.48     | BAF96022.1     |
| 3            | cement protein 20 kDa-1 [Amphibalanus amphitrite]                                                | 0.98           | 3.00E-33  | 0.37     | AFX74689.1     |
| 4            | cement protein 20 kDa-3 [Amphibalanus amphitrite]                                                | 0.71           | 4.00E-21  | 0.36     | AFX74691.1     |
| 5            | cement protein-20k [Megabalanus rosa]                                                            | 0.77           | 7.00E-16  | 0.3      | BAB18762.1     |
| LrCP-AA52-1  |                                                                                                  |                |           |          |                |
| 1            | 52 kDa cement protein [Amphibalanus amphitrite]                                                  | 1              | 0         | 0.99     | AKZ20820.1     |
| 2            | 52kDa cement protein [Megabalanus rosa]                                                          | 0.99           | 2.00E-158 | 0.46     | BAL22342.1     |
| 3            | [Megabalanus rosa=acorn barnacles, secondary cement, insoluble fraction, Peptide Partial, 28 aa] | 0.08           | 3.00E-05  | 0.61     | AAB46749.1     |
| LrCP-AA100-2 |                                                                                                  |                |           |          |                |
| 1            | 114 kDa cement protein [Amphibalanus amphitrite]                                                 | 1              | 0         | 0.99     | AKZ20818.1     |
| 2            | cement protein 100k [Amphibalanus amphitrite]                                                    | 0.98           | 0         | 0.58     | AGS19349.1     |
| 3            | cement protein-100k [Megabalanus rosa]                                                           | 1              | 0         | 0.44     | BAB12269.1     |
| LrCP-AA100-1 |                                                                                                  |                |           |          |                |
| 1            | cement protein 100k [Amphibalanus amphitrite]                                                    | 1              | 0         | 1        | AGS19349.1     |
| 2            | 114 kDa cement protein [Amphibalanus amphitrite]                                                 | 0.84           | 0         | 0.58     | AKZ20818.1     |
| 3            | cement protein-100k [Megabalanus rosa]                                                           | 0.84           | 0         | 0.49     | BAB12269.1     |
| GSrCP-AA19-2 |                                                                                                  |                |           |          |                |
| 1            | cross-beta structure silk protein 1 [Mallada signata]                                            | 0.98           | 9.00E-32  | 0.28     | ACN87361.1     |
| 2            | silk sericin MG-1 [Galleria mellonella]                                                          | 0.92           | 7.00E-25  | 0.25     | AGN03940.1     |
| 3            | cross-beta structure silk protein 2 [Mallada signata]                                            | 0.91           | 8.00E-25  | 0.27     | ACN87362.1     |
| 4            | fibroin 2 [Dolomedes tenebrosus]                                                                 | 0.94           | 2.00E-23  | 0.28     | AAK30599.1     |
| 5            | heavy-chain filboin, putative [Pediculus humanus corporis]                                       | 0.94           | 2.00E-22  | 0.28     | XP_002432277.1 |
| 6            | dragline silk protein [Nephila clavipes]                                                         | 0.95           | 3.00E-22  | 0.28     | AAL32375.1     |
| 7            | efibroin [Aposthonia gurneyi]                                                                    | 0.82           | 2.00E-21  | 0.25     | ABW24185.1     |
| 8            | minor ampullate spidroin 1-like protein [Latrodectus hesperus]                                   | 0.93           | 3.00E-21  | 0.26     | ACB29694.1     |
| 9            | minor ampullate spidroin-like protein [Nephilengys cruentata]                                    | 0.9            | 3.00E-21  | 0.26     | ABR37276.1     |
| 10           | spidroin 1 [Nephila clavipes]                                                                    | 0.92           | 6.00E-21  | 0.29     | AAC38957.1     |
| 11           | major ampullate spidroin-like protein [Latrodectus geometricus]                                  | 0.9            | 2.00E-20  | 0.25     | AAV91960.1     |
| 12           | cement protein-19k [Fistulobalanus albicostatus]                                                 | 0.86           | 2.00E-20  | 0.36     | BAE94410.1     |
| GSrCP-AA43-1 |                                                                                                  |                |           |          |                |
| 1            | cross-beta structure silk protein 1 [Mallada signata]                                            | 0.8            | 3.00E-33  | 0.3      | ACN87361.1     |
| 2            | silk sericin MG-1 [Galleria mellonella]                                                          | 0.81           | 7.00E-29  | 0.26     | AGN03940.1     |
| 3            | cross-beta structure silk protein 2 [Mallada signata]                                            | 0.8            | 3.00E-26  | 0.28     | ACN87362.1     |
| 4            | silk sericin MG-2 [Galleria mellonella]                                                          | 0.78           | 5.00E-25  | 0.22     | AGN03941.1     |
| 5            | efibroin [Aposthonia gurneyi]                                                                    | 0.78           | 2.00E-24  | 0.26     | ABW24185.1     |
| 6            | mucin related 29B [Drosophila melanogaster]                                                      | 0.8            | 5.00E-24  | 0.25     | NP_723377.1    |
| 7            | silk fibroin [Haploembia solieri]                                                                | 0.8            | 8.00E-23  | 0.27     | AEC12432.1     |
| 8            | sericin 1 [Bombyx mandarina]                                                                     | 0.82           | 2.00E-22  | 0.27     | ADY69178.1     |
| 9            | sericin 1A' [Bombyx mori]                                                                        | 0.81           | 3.00E-22  | 0.26     | BAD00699.1     |
| 10           | serine-rich protein3 [Samia ricini]                                                              | 0.86           | 5.00E-22  | 0.23     | BAS31055.1     |
| 11           | sericin 3 precursor [Bombyx mori]                                                                | 0.81           | 1.00E-21  | 0.23     | NP_001108116.1 |
| 12           | serine-rich protein5 [Samia ricini]                                                              | 0.77           | 1.00E-21  | 0.24     | BAS31057.1     |
| GSrCP-AA19-5 |                                                                                                  |                |           |          |                |
| 1            | cross-beta structure silk protein 1 [Mallada signata]                                            | 0.95           | 1.00E-10  | 0.25     | ACN87361.1     |
| 2            | sericin 3 precursor [Bombyx mori]                                                                | 0.88           | 1.00E-09  | 0.21     | NP_001108116.1 |
| 3            | cross-beta structure silk protein 2 [Mallada signata]                                            | 0.94           | 1.00E-09  | 0.22     | ACN87362.1     |
| 4            | serine-rich protein3 [Samia ricini]                                                              | 0.85           | 6.00E-09  | 0.22     | BAS31055.1     |

|                     |                                                                                                                     |      |          |      |                |
|---------------------|---------------------------------------------------------------------------------------------------------------------|------|----------|------|----------------|
| 5                   | hornet silk protein Vssilk 4 [Vespa simillima xanthoptera]                                                          | 0.92 | 1.00E-08 | 0.21 | BAJ09449.1     |
| 6                   | hornet silk protein Vssilk 4 [Vespa simillima xanthoptera]                                                          | 0.92 | 1.00E-08 | 0.21 | BAF95004.1     |
| 7                   | sericin 1 precursor [Bombyx mori]                                                                                   | 0.86 | 2.00E-08 | 0.22 | NP_001037506.1 |
| 8                   | fibroin 1 [Euagrus chioseus]                                                                                        | 0.95 | 3.00E-08 | 0.22 | ABW80568.1     |
| 9                   | sericin 1 [Bombyx mandarina]                                                                                        | 0.85 | 3.00E-08 | 0.22 | ADY69178.1     |
| 10                  | heavy chain fibroin [Hepialus californicus]                                                                         | 0.91 | 3.00E-08 | 0.24 | ADE58103.1     |
| 11                  | cement protein-19k [Fistulobalanus albicostatus]                                                                    | 0.57 | 4.00E-08 | 0.24 | BAE94410.1     |
| 12                  | silk sericin MG-1 [Galleria mellonella]                                                                             | 0.93 | 4.00E-08 | 0.2  | AGN03940.1     |
| GSrCP-AA19-4        |                                                                                                                     |      |          |      |                |
| 1                   | cement protein-19k [Fistulobalanus albicostatus]                                                                    | 0.69 | 1.00E-28 | 0.38 | BAE94410.1     |
| 2                   | 19 kDa cement protein [Amphibalanus amphitrite]                                                                     | 0.81 | 2.00E-22 | 0.33 | AKZ20819.1     |
| 3                   | GL10349 [Drosophila persimilis]                                                                                     | 0.16 | 2.00E-22 | 0.54 | XP_002016723.1 |
| 4                   | Diacylglycerol kinase kappa [Melipona quadrifasciata]                                                               | 0.22 | 3.00E-21 | 0.4  | KOX74686.1     |
| 5                   | RecName: Full=Protein TsetseEP; AltName: Full=EP-repeat protein;<br>Flags: Precursor [Glossina morsitans morsitans] | 0.15 | 3.00E-21 | 0.54 | Q95P09.1       |
| 6                   | RecName: Full=Protein TsetseEP; AltName: Full=EP-repeat protein;<br>Flags: Precursor [Glossina palpalis palpalis]   | 0.15 | 6.00E-21 | 0.54 | Q8T4N5.1       |
| 7                   | cement protein-19k [Megabalanus rosa]                                                                               | 0.81 | 3.00E-20 | 0.32 | BAE94409.1     |
| 8                   | cement protein-19k [Balanus improvisus]                                                                             | 0.7  | 8.00E-20 | 0.34 | BAE94411.1     |
| 9                   | hypothetical protein DAPPUDRAFT_98962 [Daphnia pulex]                                                               | 0.35 | 1.00E-17 | 0.32 | EFX85380.1     |
| 10                  | silk sericin MG-1 [Galleria mellonella]                                                                             | 0.7  | 2.00E-17 | 0.24 | AGN03940.1     |
| 11                  | cross-beta structure silk protein 1 [Mallada signata]                                                               | 0.72 | 1.00E-16 | 0.27 | ACN87361.1     |
| 12                  | Cell surface glycoprotein 1 [Papilio xuthus]                                                                        | 0.31 | 2.00E-16 | 0.44 | KPI98596.1     |
| GSrCP-AA19-3        |                                                                                                                     |      |          |      |                |
| 1                   | cement protein-19k [Megabalanus rosa]                                                                               | 0.81 | 4.00E-29 | 0.35 | BAE94409.1     |
| 2                   | cement protein-19k [Fistulobalanus albicostatus]                                                                    | 0.74 | 1.00E-27 | 0.4  | BAE94410.1     |
| 3                   | 19 kDa cement protein [Amphibalanus amphitrite]                                                                     | 0.84 | 3.00E-25 | 0.34 | AKZ20819.1     |
| 4                   | cement protein-19k [Balanus improvisus]                                                                             | 0.74 | 1.00E-21 | 0.35 | BAE94411.1     |
| 5                   | RecName: Full=Protein TsetseEP; AltName: Full=EP-repeat protein;<br>Flags: Precursor [Glossina morsitans morsitans] | 0.18 | 1.00E-16 | 0.49 | Q95P09.1       |
| 6                   | RecName: Full=Protein TsetseEP; AltName: Full=EP-repeat protein;<br>Flags: Precursor [Glossina palpalis palpalis]   | 0.16 | 2.00E-16 | 0.55 | Q8T4N5.1       |
| 7                   | GL10349 [Drosophila persimilis]                                                                                     | 0.22 | 3.00E-16 | 0.38 | XP_002016723.1 |
| 8                   | Diacylglycerol kinase kappa [Melipona quadrifasciata]                                                               | 0.38 | 3.00E-16 | 0.51 | KOX74686.1     |
| 9                   | pyriform spidroin 2 [Nephila clavipes]                                                                              | 0.93 | 5.00E-15 | 0.24 | ADK92884.1     |
| 10                  | Poly(U)-specific endoribonuclease like protein [Melipona quadrifasciata]                                            | 0.71 | 1.00E-13 | 0.25 | KOX78239.1     |
| 11                  | hypothetical protein DAPPUDRAFT_98962 [Daphnia pulex]                                                               | 0.31 | 4.00E-13 | 0.36 | EFX85380.1     |
| 12                  | GL19041 [Drosophila persimilis]                                                                                     | 0.18 | 3.00E-12 | 0.43 | XP_002014267.1 |
| comp27593_c0_seq1_5 |                                                                                                                     |      |          |      |                |
| 1                   | cross-beta structure silk protein 1 [Mallada signata]                                                               | 0.94 | 2.00E-11 | 0.32 | ACN87361.1     |
| 2                   | major ampullate spidroin 1 [Kukulcania hibernalis]                                                                  | 0.94 | 9.00E-11 | 0.3  | AAT08433.1     |
| 3                   | egg case silk protein 2 [Latrodectus hesperus]                                                                      | 0.72 | 2.00E-10 | 0.33 | ABC68105.1     |
| 4                   | cross-beta structure silk protein 2 [Mallada signata]                                                               | 0.89 | 3.00E-10 | 0.32 | ACN87362.1     |
| 5                   | major ampullate spidroin [Agelenopsis aperta]                                                                       | 0.72 | 3.00E-10 | 0.35 | ADM14325.1     |
| 6                   | efibroin [Aposthonia gurneyi]                                                                                       | 0.76 | 3.00E-10 | 0.29 | ABW24185.1     |
| 7                   | major ampullate spidroin [Agelenopsis aperta]                                                                       | 0.72 | 6.00E-10 | 0.35 | AAT08436.1     |
| 8                   | MiSp [Uloborus diversus]                                                                                            | 0.97 | 7.00E-10 | 0.32 | ABD61597.1     |
| 9                   | silk fibroin [Antipaluria urichi]                                                                                   | 0.72 | 8.00E-10 | 0.3  | ACJ04053.1     |
| 10                  | lingerer, isoform L [Drosophila melanogaster]                                                                       | 0.77 | 1.00E-09 | 0.32 | NP_001303338.1 |
| 11                  | lingerer, isoform K [Drosophila melanogaster]                                                                       | 0.77 | 1.00E-09 | 0.32 | NP_001260795.1 |
| 12                  | lingerer, isoform J [Drosophila melanogaster]                                                                       | 0.77 | 3.00E-09 | 0.32 | NP_001260794.1 |

129

130 Supplementary Table S6. Top 12 unfiltered nrNCBI search results for GSrCP and LrCP proteins.

131

132



| Right to Left        | Top to bottom        |
|----------------------|----------------------|
| SIPC                 | Aacp19k 203 aa       |
| comp55944_c0_seq1_4  | comp45928_c1_seq1_6, |
| Aacp19k 203 aa       | comp40515_c0_seq1_5, |
| comp45928_c1_seq1_6, | comp46137_c1_seq5_5  |
| comp40515_c0_seq1_5, | comp46330_c0_seq1_6, |
| comp46137_c1_seq5_5  | comp170921_c0_seq1_1 |
| comp46330_c0_seq1_6  | comp87199_c0_seq1_5  |
| comp33102_c0_seq1_4  | comp33102_c0_seq1_4  |
| comp88850_c0_seq1_5  | comp88850_c0_seq1_5  |
| comp170921_c0_seq1_1 | comp83572_c0_seq1_4  |
| comp87199_c0_seq1_5  | comp25062_c0_seq1_5  |
| comp56597_c0_seq1_4  | comp44772_c0_seq1_4, |
| comp43534_c0_seq1_4  | comp41238_c0_seq1_4, |
| comp43852_c1_seq1_2  | comp49909_c1_seq1_6, |
| comp44898_c1_seq1_4  | comp27593_c0_seq1_5, |
| comp44997_c0_seq1_6  | comp27343_c0_seq1_4  |
| comp45011_c0_seq1_5  | comp41724_c1_seq1_5  |
| comp79394_c0_seq1_2  | comp45426_c4_seq1_5, |
| CL1249.Contig1_Ba_mi | comp43852_c1_seq1_2  |
| comp43534_c0_seq2_4  | comp81853_c0_seq1_6  |
| comp60205_c0_seq1_5  | Aacp100k(HK)         |
| comp44772_c0_seq1_4, | comp84577_c0_seq1_4  |
| comp41724_c1_seq1_5  | comp135234_c0_seq1_5 |
| comp81853_c0_seq1_6  | comp25334_c1_seq1_5  |
| comp45426_c4_seq1_5, | comp47308_c0_seq1_4, |
| comp25062_c0_seq1_5  | comp46196_c0_seq1_5  |
| comp83572_c0_seq1_4  | Aacp52k              |
| comp41238_c0_seq1_4, | comp33562_c1_seq1_4  |
| comp56597_c0_seq1_4, | comp33562_c0_seq1_3  |
| comp27593_c0_seq1_5, | comp47983_c0_seq1_6  |
| comp27343_c0_seq1_4  | comp43534_c0_seq2_4  |
| comp49909_c1_seq1_6  | comp80764_c0_seq1_4  |
| Aacp20k-1            | CL215.Contig2_Ba_mix |
| comp33562_c1_seq1_4  | comp80527_c0_seq1_6  |
| comp33562_c0_seq1_3  | comp44898_c1_seq1_4  |
| Aacp52k              | comp45011_c0_seq1_5  |
| comp48220_c0_seq1_6  | comp44997_c0_seq1_6  |
| Aacp114k-I (NRL)     | CL1249.Contig1_Ba_mi |
| comp48863_c0_seq1_5  | comp79394_c0_seq1_2  |
| Aacp20k-2 136 aa     | Aacp20k-1            |
| comp47308_c0_seq1_4, | comp60205_c0_seq1_5  |
| comp46196_c0_seq1_5  | SIPC                 |
| comp25334_c1_seq1_5  | comp55944_c0_seq1_4  |
| comp47983_c0_seq1_6  | Aacp114k-I (NRL)     |
| comp84577_c0_seq1_4  | comp56597_c0_seq1_4, |
| comp135234_c0_seq1_5 |                      |
| comp39288_c0_seq1_5  |                      |
| Aacp100k(HK)         |                      |
| comp80764_c0_seq1_4  |                      |
| CL215.Contig2_Ba_mix |                      |
| comp80527_c0_seq1_6  |                      |

| Homologous Pairs    |                     |
|---------------------|---------------------|
| X                   | Y                   |
| comp45928_c1_seq1_6 | Comp27343_c0_seq1_4 |
| Comp25062_c0_seq1_5 | Comp41724_c1_seq1_5 |
| AACP114 (NRL)       | AACP100 (HK)        |
| AACP20-1            | AACP20-2            |
| Comp43534_c0_seq1_4 | Comp43534_c0_seq2_4 |
| Comp80764_c0_seq1_4 | Comp55944_c0_seq1_4 |
| AACP100 (HK)        | AACP114 (NRL)       |
| AACP20-2            | AACP20-1            |
| Comp41724_c1_seq1_5 | Comp25062_c0_seq1_5 |

133  
134  
135  
136  
137  
138  
139  
140  
141  
142  
143  
144  
145

Supplementary Tables S7 and S8. Corresponding protein IDs for 2D heat map in Figure 2 and discrete pairs.

146

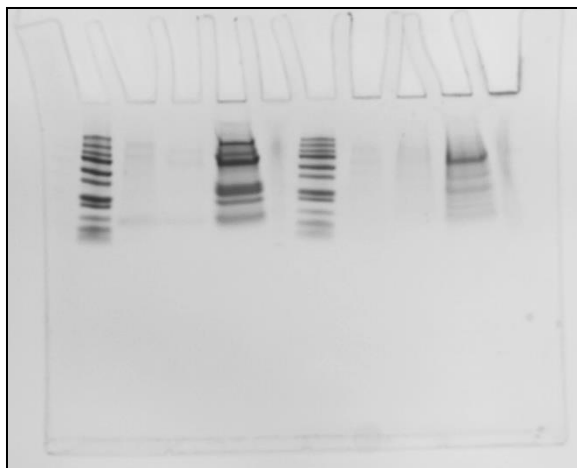

147

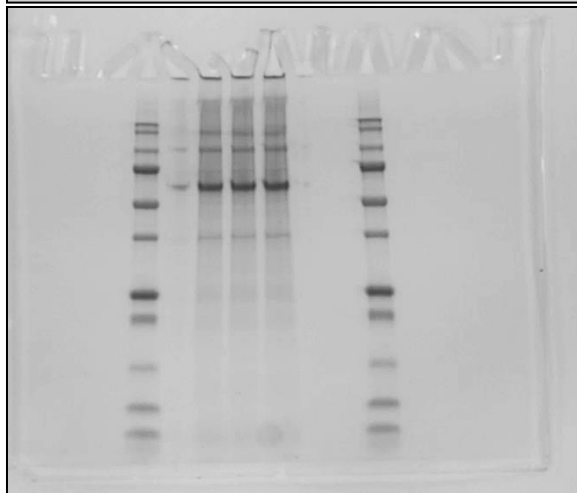

148

149 Supplementary Figure S7. Uncropped whole gel images from Figure 1: top- solubility of cement  
150 as shown in Fig. 1b from the main text, middle- cement from microsphere as shown in Fig. 1c,  
151 and bottom, cement from opaque glue as shown in Fig. 1c.

152

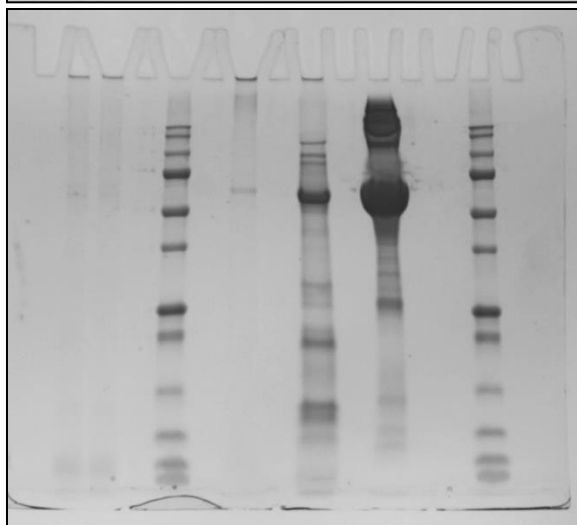

Supplement: srep36219-s1.pdf [file srep36219-s1.pdf]
